# Supplementary material
Source: PubMed Central journal article supplement (PMC8811535)
Supplement: mmc1.pdf [file mmc1.pdf]

# THE LANCET

## Supplementary appendix

This appendix formed part of the original submission and has been peer reviewed. We post it as supplied by the authors.

Supplement to: Wolter N, Jassat W, Walaza S, et al. Early assessment of the clinical severity of the SARS-CoV-2 omicron variant in South Africa: a data linkage study. *Lancet* 2022; published online Jan 19. [https://doi.org/10.1016/S0140-6736\(22\)00017-4](https://doi.org/10.1016/S0140-6736(22)00017-4).

**Supplement**

**Supplementary Table 1.** Multivariable logistic regression analysis evaluating factors associated with S gene target failure (SGTF) infection compared to non-SGTF infection among hospitalised individuals, 1 October – 30 November 2021<sup>a</sup> (N=302)

|                          | <b>Non-SGTF<sup>b</sup></b> | <b>SGTF<sup>b</sup></b> | <b>Odds ratio</b> | <b>Adjusted odds ratio</b> | <b>P-value</b> |
|--------------------------|-----------------------------|-------------------------|-------------------|----------------------------|----------------|
|                          | <b>n (%)</b>                | <b>n/N (%)</b>          | <b>(95% CI)</b>   | <b>(95% CI)</b>            |                |
| <b>Age group (years)</b> | <b>N=113</b>                | <b>N=204</b>            |                   |                            |                |
| <5                       | 7 (6)                       | 20 (10)                 | 3.5 (1.6-9.7)     | 1.0 (0.3-3.4)              | 0.962          |
| 5-12                     | 2 (2)                       | 6 (3)                   | 3.7 (0.7-20.0)    | 1.9 (0.3-11.9)             | 0.498          |
| 13-18                    | 2 (2)                       | 6 (3)                   | 3.7 (0.7-20.0)    | 1.7 (0.3-11.0)             | 0.559          |
| 19-24                    | 3 (3)                       | 20 (10)                 | 8.3 (2.2-31.0)    | 7.5 (1.5-38.1)             | <b>0.016</b>   |
| 25-39                    | 35 (31)                     | 101 (50)                | 3.6 (1.9-6.9)     | 2.0 (0.9-4.7)              | 0.096          |
| 40-59                    | 33 (29)                     | 26 (13)                 | 1.0 (0.5-2.0)     | 0.8 (0.3-1.8)              | 0.535          |
| ≥60                      | 31 (27)                     | 25 (13)                 | Ref               | Ref                        | -              |
| <b>Sex</b>               | <b>N=113</b>                | <b>N=202</b>            |                   |                            |                |
| Male                     | 47 (42)                     | 73 (36)                 | Ref               | Ref                        | -              |
| Female                   | 66 (58)                     | 129 (64)                | 1.3 (0.8-2.0)     | 1.2 (0.7-2.2)              | 0.466          |
| <b>Province</b>          | <b>N=107</b>                | <b>N=201</b>            |                   |                            |                |
| Eastern Cape             | 0 (0)                       | 0 (0)                   | -                 | -                          | -              |
| Free State               | 5 (5)                       | 3 (1)                   | 3.0 (0.4-24.2)    | 1.4 (0.1-15.8)             | 0.805          |
| Gauteng                  | 64 (60)                     | 166 (83)                | 13.0 (2.8-60.8)   | 4.3 (0.8-22.5)             | 0.086          |
| KwaZulu-Natal            | 21 (20)                     | 17 (8)                  | 4.0 (0.8-21.0)    | 1.2 (0.2-7.5)              | 0.833          |
| Limpopo                  | 0 (0)                       | 5 (2)                   | -                 | -                          | -              |
| Mpumalanga               | 1 (1)                       | 3 (1)                   | 15.0 (1.0-228.9)  | 4.3 (0.2-85.7)             | 0.342          |
| North West               | 3 (3)                       | 4 (2)                   | 6.7 (0.8-56.2)    | 1.6 (0.2-15.8)             | 0.691          |
| Northern                 | 3 (3)                       | 1 (1)                   | 1.7 (0.1-25.4)    | 0.9 (0.0-18.3)             | 0.962          |
| Cape                     |                             |                         |                   |                            | -              |
| Western Cape             | 10 (9)                      | 2 (1)                   | Ref               | Ref                        |                |
| <b>Healthcare sector</b> | <b>N=113</b>                | <b>N=204</b>            |                   |                            |                |

|                                             |                           |          |          |               |               |                  |
|---------------------------------------------|---------------------------|----------|----------|---------------|---------------|------------------|
|                                             | Public                    | 68 (60)  | 62 (30)  | Ref           | Ref           | -                |
|                                             | Private                   | 45 (40)  | 142 (70) | 3.5 (2.1-5.6) | 3.1 (1.6-5.7) | <b>&lt;0.001</b> |
| <b>Days between diagnosis and admission</b> |                           | N=113    | N=204    |               |               |                  |
|                                             | 1-7 days before diagnosis | 17 (15)  | 21 (10)  | Ref           | Ref           | -                |
|                                             | 0-6 days after diagnosis  | 93 (82)  | 182 (89) | 1.6 (0.8-3.1) | 0.9 (0.4-2.3) | 0.906            |
|                                             | 7-21 days after diagnosis | 3 (3)    | 1 (0)    | 0.3 (0.0-2.8) | 0.5 (0.0-7.1) | 0.593            |
| <b>Reinfection<sup>c</sup></b>              |                           | N=113    | N=204    |               |               |                  |
|                                             | No                        | 107 (95) | 183 (90) | Ref           | Ref           | -                |
|                                             | Yes                       | 6 (5)    | 21 (10)  | 2.0 (0.8-5.2) | 2.2 (0.6-7.5) | 0.218            |
| <b>Co-morbidity<sup>d</sup></b>             |                           | N=113    | N=204    |               |               |                  |
|                                             | Absent                    | 77 (68)  | 178 (87) | Ref           | Ref           | -                |
|                                             | Present                   | 36 (32)  | 26 (13)  | 0.3 (0.2-0.6) | 0.6 (0.3-1.3) | 0.197            |
| <b>SARS-CoV-2 vaccination<sup>e</sup></b>   |                           | N=113    | N=204    |               |               |                  |
|                                             | No                        | 18 (16)  | 24 (12)  | Ref           | Ref           | -                |
|                                             | Yes                       | 5 (4)    | 4 (2)    | 0.6 (0.1-2.6) | 0.3 (0.1-2.2) | 0.254            |
|                                             | Unknown                   | 90 (80)  | 176 (86) | 1.5 (0.8-2.8) | 0.9 (0.4-2.3) | 0.857            |
| <b>Severe disease<sup>f</sup></b>           |                           | N=113    | N=204    |               |               |                  |
|                                             | No                        | 68 (60)  | 162 (79) | Ref           | Ref           | -                |
|                                             | Yes                       | 45 (40)  | 42 (21)  | 0.4 (0.2-0.7) | 0.7 (0.3-1.5) | 0.353            |

<sup>a</sup> Cases followed-up for in-hospital outcome until 21 December 2021

<sup>b</sup> S gene target failure (proxy for Omicron variant)

<sup>c</sup> Re-infection was defined as an individual with at least one positive SARS-CoV-2 test >90 days prior to the current episode

<sup>d</sup> Co-morbidity defined as ≥1 of the following conditions: hypertension, diabetes, chronic cardiac disease, chronic kidney disease, asthma, chronic obstructive pulmonary disease (COPD), malignancy, HIV, and active or past tuberculosis

<sup>e</sup> Vaccination defined as ≥1 dose of SARS-CoV-2 vaccine (Johnson & Johnson / Pfizer-BioNTech)

<sup>f</sup> Severe disease defined as a hospitalized patient meeting at least one of the following criteria: admitted to ICU, received oxygen treatment, ventilated, received extracorporeal membrane oxygenation (ECMO), experienced acute respiratory distress syndrome (ARDS) and/or died

**Supplementary Table 2.** Multivariable logistic regression analysis evaluating factors associated with S gene target failure (SGTF) infection during 1 October – 30 November 2021, compared to Delta variant infection during April – November 2021, among hospitalized individuals with known outcome<sup>a</sup>, South Africa (N=989)

|                          | <b>Delta<br/>n (%)</b> | <b>SGTF<sup>b</sup><br/>n/N (%)</b> | <b>Odds ratio<br/>(95% CI)</b> | <b>Adjusted odds ratio<br/>(95% CI)</b> | <b>P-value</b>   |
|--------------------------|------------------------|-------------------------------------|--------------------------------|-----------------------------------------|------------------|
| <b>Age group (years)</b> | <b>N=793</b>           | <b>N=244</b>                        |                                |                                         |                  |
| <5                       | 21 (3)                 | 20 (8)                              | 11.4 (5.5-23.6)                | 7.6 (1.9-30.7)                          | <b>0.005</b>     |
| 5-12                     | 9 (1)                  | 7 (3)                               | 9.3 (3.2-26.9)                 | 13.4 (1.6-111.8)                        | <b>0.016</b>     |
| 13-18                    | 18 (2)                 | 4 (2)                               | 2.7 (0.8-8.4)                  | 5.8 (0.7-49.2)                          | 0.107            |
| 19-24                    | 21 (3)                 | 21 (9)                              | 12.0 (5.9-24.6)                | 15.0 (3.8-58.9)                         | <b>&lt;0.001</b> |
| 25-39                    | 123 (16)               | 120 (49)                            | 11.7 (7.4-18.6)                | 9.7 (4.3-21.7)                          | <b>&lt;0.001</b> |
| 40-59                    | 265 (33)               | 44 (18)                             | 2.0 (1.2-3.3)                  | 1.4 (0.6-3.0)                           | 0.404            |
| ≥60                      | 336 (42)               | 28 (11)                             | Ref                            | Ref                                     | -                |
| <b>Sex</b>               | <b>N=792</b>           | <b>N=244</b>                        |                                |                                         |                  |
| Male                     | 330 (42)               | 95 (39)                             | Ref                            | Ref                                     | -                |
| Female                   | 462 (58)               | 149 (61)                            | 1.1 (0.8-1.5)                  | 0.7 (0.4-1.2)                           | 0.240            |
| <b>Province</b>          | <b>N=793</b>           | <b>N=244</b>                        |                                |                                         |                  |
| Eastern Cape             | 47 (6)                 | 0 (0)                               | -                              | -                                       | -                |
| Free State               | 2 (0)                  | 2 (1)                               | 83.5 (7.5-925.3)               | 129.2 (4.0-4183.8)                      | <b>0.006</b>     |
| Gauteng                  | 232 (29)               | 200 (82)                            | 72.0 (17.6-293.9)              | 25.3 (5.5-117.0)                        | <b>&lt;0.001</b> |
| KwaZulu-Natal            | 26 (3)                 | 22 (9)                              | 70.6 (15.7-318.3)              | 34.5 (5.5-216.7)                        | <b>&lt;0.001</b> |
| Limpopo                  | 99 (12)                | 4 (2)                               | 3.4 (0.6-18.8)                 | 1.8 (0.2-14.8)                          | 0.564            |
| Mpumalanga               | 55 (7)                 | 5 (2)                               | 7.6 (1.4-40.2)                 | 0.7 (0.1-4.9)                           | 0.734            |

|                                             |                           |              |              |                  |                  |                  |
|---------------------------------------------|---------------------------|--------------|--------------|------------------|------------------|------------------|
|                                             | North West                | 140 (18)     | 8 (3)        | 4.8 (1.0-22.8)   | 1.5 (0.2-9.0)    | 0.651            |
|                                             | Northern Cape             | 25 (3)       | 1 (0)        | 3.3 (0.3-38.2)   | 7.6 (0.5-105.7)  | 0.131            |
|                                             | Western Cape              | 167 (21)     | 2 (1)        | Ref              | Ref              | -                |
| <b>Healthcare sector</b>                    |                           | <b>N=793</b> | <b>N=244</b> |                  |                  |                  |
|                                             | Public                    | 737 (93)     | 50 (20)      | Ref              | Ref              | -                |
|                                             | Private                   | 56 (7)       | 194 (80)     | 51.1 (33.8-77.2) | 27.6 (14.6-52.3) | <b>&lt;0.001</b> |
| <b>Days between diagnosis and admission</b> |                           | <b>N=793</b> | <b>N=244</b> |                  |                  |                  |
|                                             | 1-7 days before diagnosis | 249 (31)     | 18 (7)       | Ref              | Ref              | -                |
|                                             | 0-6 days after diagnosis  | 487 (61)     | 199 (82)     | 5.7 (3.4-9.4)    | 2.1 (0.9-4.9)    | 0.084            |
|                                             | 7-21 days after diagnosis | 57 (7)       | 27 (11)      | 6.6 (3.4-12.7)   | 1.5 (0.5-4.9)    | 0.479            |
| <b>Reinfection<sup>c</sup></b>              |                           | <b>N=793</b> | <b>N=244</b> |                  |                  |                  |
|                                             | No                        | 785 (99)     | 215 (88)     | Ref              | Ref              | -                |
|                                             | Yes                       | 8 (1)        | 29 (12)      | 13.2 (6.0-29.4)  | 22.7 (4.3-120.6) | <b>&lt;0.001</b> |
| <b>Co-morbidity<sup>d</sup></b>             |                           | <b>N=793</b> | <b>N=244</b> |                  |                  |                  |
|                                             | Absent                    | 449 (57)     | 209 (86)     | Ref              | Ref              | -                |
|                                             | Present                   | 344 (43)     | 35 (14)      | 0.2 (0.1-0.3)    | 1.0 (0.5-1.9)    | 0.956            |
| <b>SARS-CoV-2 vaccination<sup>e</sup></b>   |                           | <b>N=793</b> | <b>N=244</b> |                  |                  |                  |
|                                             | No                        | 185 (23)     | 22 (9)       | Ref              | Ref              | -                |
|                                             | Yes                       | 30 (4)       | 8 (3)        | 2.2 (0.9-5.5)    | 2.3 (0.4-12.1)   | 0.341            |
|                                             | Unknown                   | 578 (73)     | 214 (88)     | 3.1 (1.9-5.0)    | 1.8 (0.8-4.0)    | 0.150            |
| <b>Severe disease<sup>f</sup></b>           |                           | <b>N=793</b> | <b>N=244</b> |                  |                  |                  |
|                                             | No                        | 297 (37)     | 187 (77)     | Ref              | Ref              | -                |

|     |          |         |               |               |                  |
|-----|----------|---------|---------------|---------------|------------------|
| Yes | 496 (63) | 57 (23) | 0.2 (0.1-0.3) | 0.3 (0.1-0.5) | <b>&lt;0.001</b> |
|-----|----------|---------|---------------|---------------|------------------|

<sup>a</sup> Cases followed-up for in-hospital outcome until 21 December 2021

<sup>b</sup> S gene target failure (proxy for Omicron variant)

<sup>c</sup> Re-infection was defined as an individual with at least one positive SARS-CoV-2 test >90 days prior to the current episode

<sup>d</sup> Co-morbidity defined as  $\geq 1$  of the following conditions: hypertension, diabetes, chronic cardiac disease, chronic kidney disease, asthma, chronic obstructive pulmonary disease (COPD), malignancy, HIV, and active or past tuberculosis

<sup>e</sup> Vaccination defined as  $\geq 1$  dose of SARS-CoV-2 vaccine (Johnson & Johnson / Pfizer-BioNTech)

<sup>f</sup> Severe disease defined as a hospitalized patient meeting at least one of the following criteria: admitted to ICU, received oxygen treatment, ventilated, received extracorporeal membrane oxygenation (ECMO), experienced acute respiratory distress syndrome (ARDS) and/or died

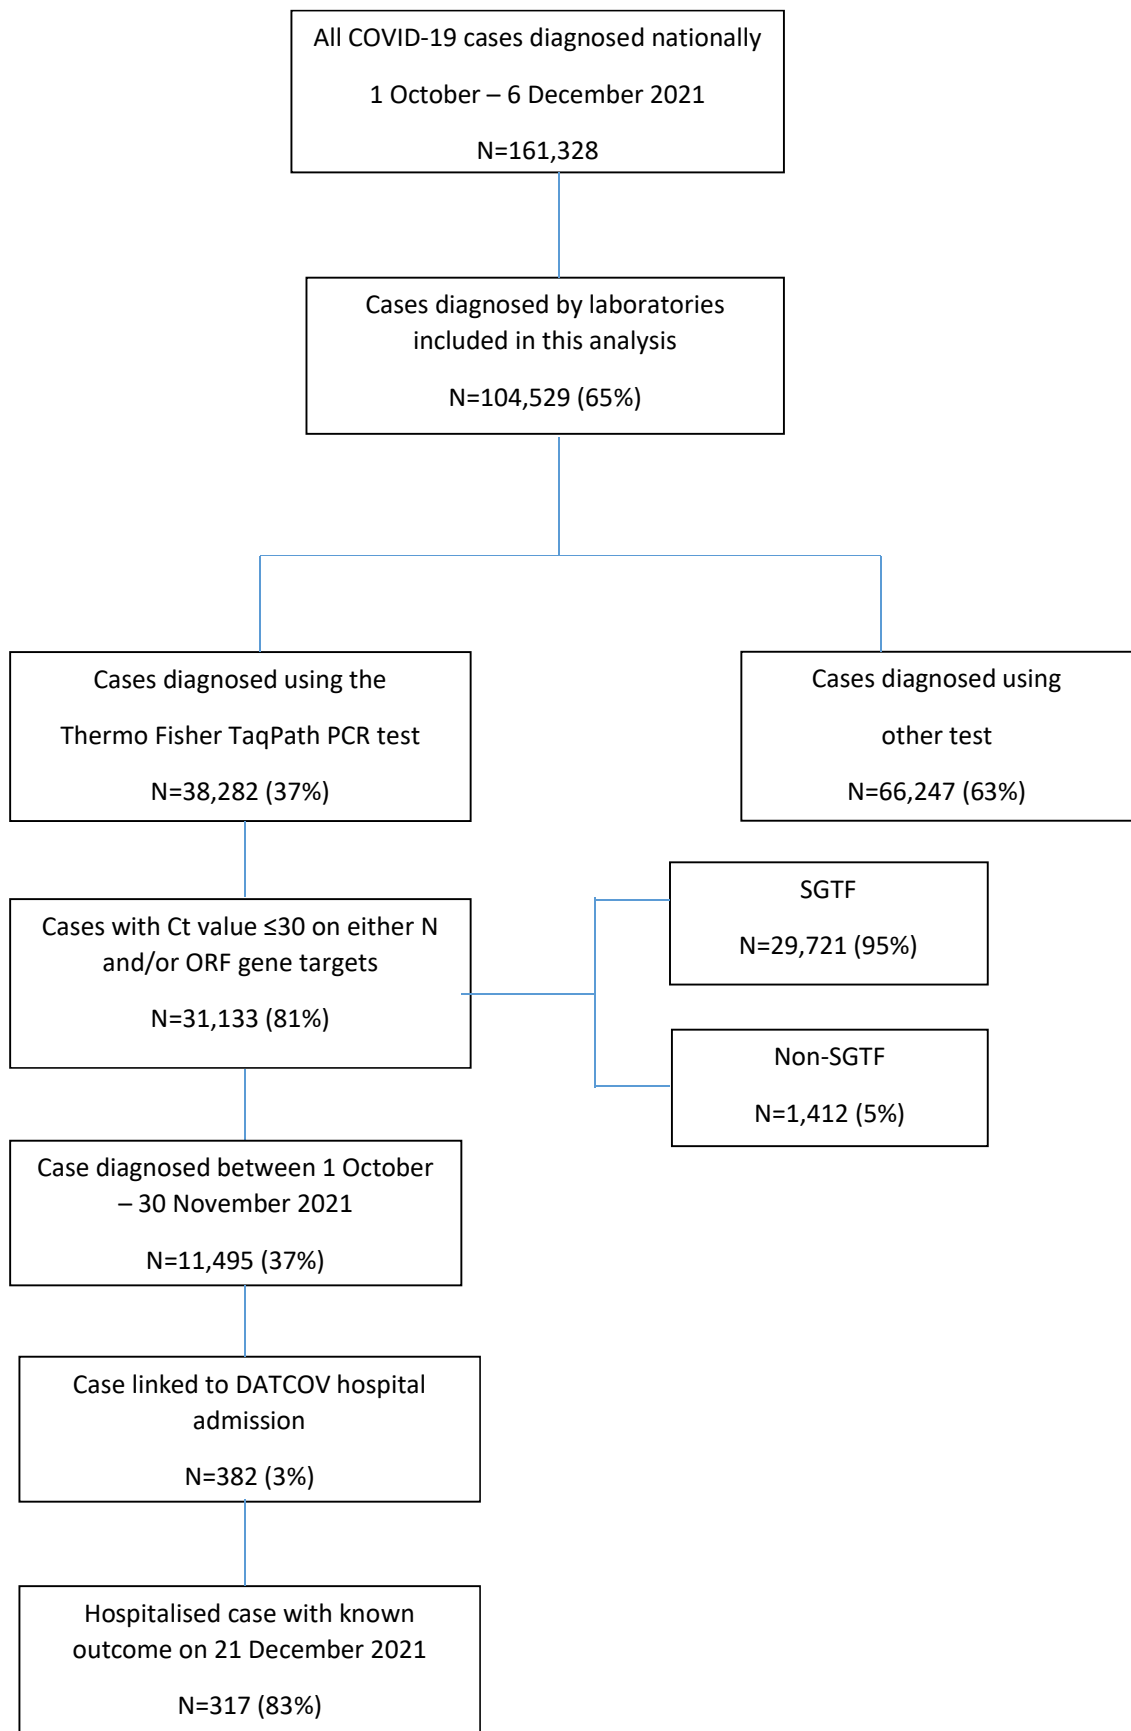

**Supplementary Figure 1.** Flowchart of COVID-19 cases diagnosed in South Africa between 1 October – 6 December 2021 and linkage to test and hospitalisation data

PCR – polymerase chain reaction, Ct – cycle threshold, SGTF - S gene target failure



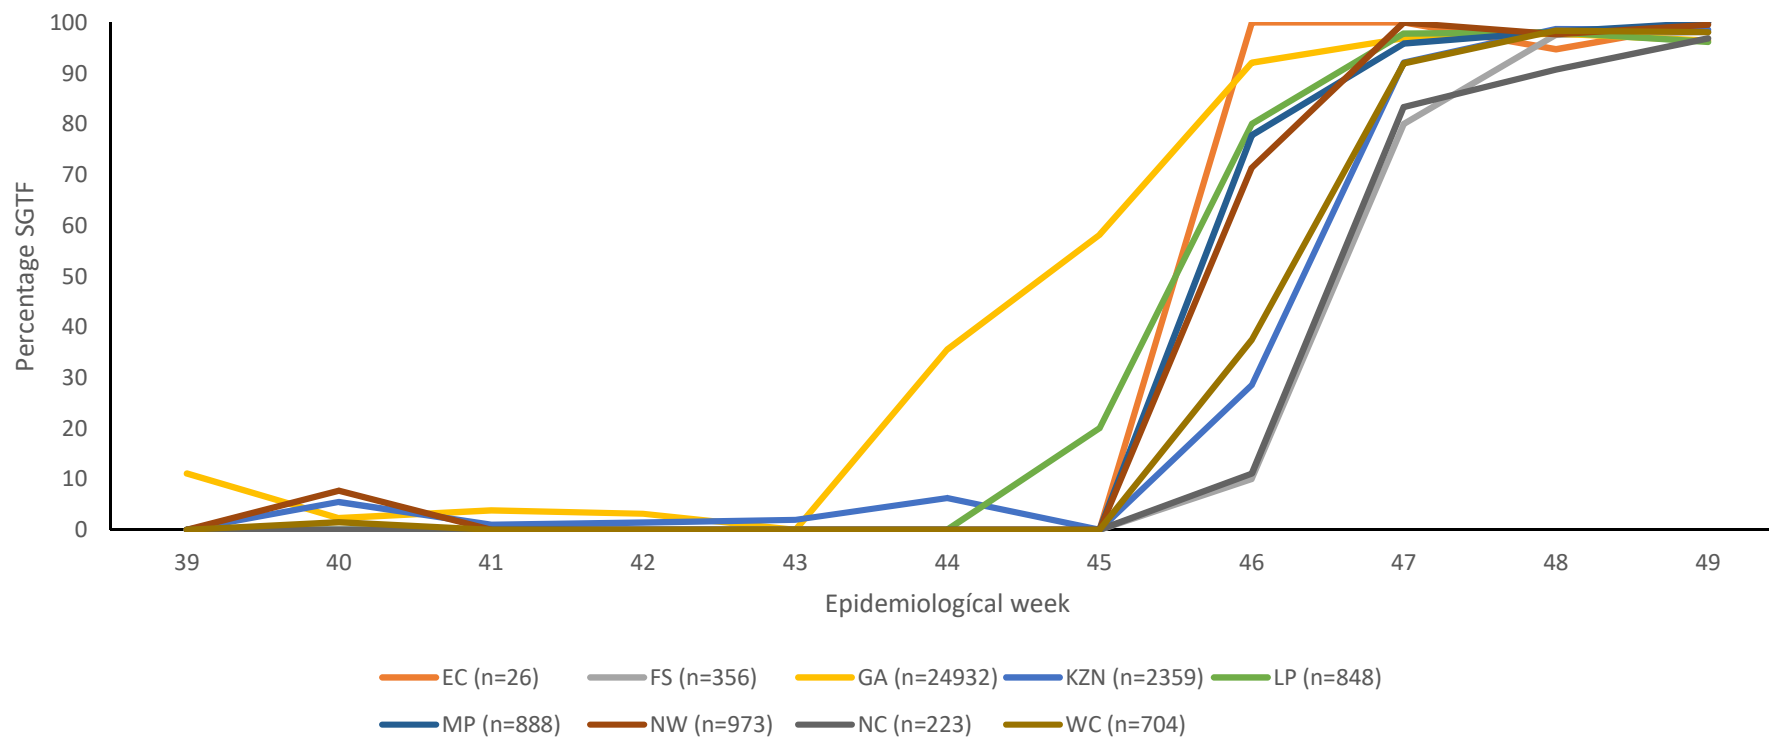

**Supplementary Figure 2.** Percentage of S gene target failure (SGTF) infections among tests performed on the TaqPath assay by epidemiological week and province, DATCOV-Gen, 1 October – 6 December 2021. GA, Gauteng; NW, North West; KZN, KwaZulu-Natal; WC, Western Cape; LP, Limpopo; EC, Eastern Cape; MP, Mpumalanga; NC, Northern Cape; FS, Free State
